# Supplementary material
Source: publisher figshare collection journal article supplement (https://frontiersin.figshare.com/ndownloader/files/26116976)
Supplement: Supplementary file [file 26116976]

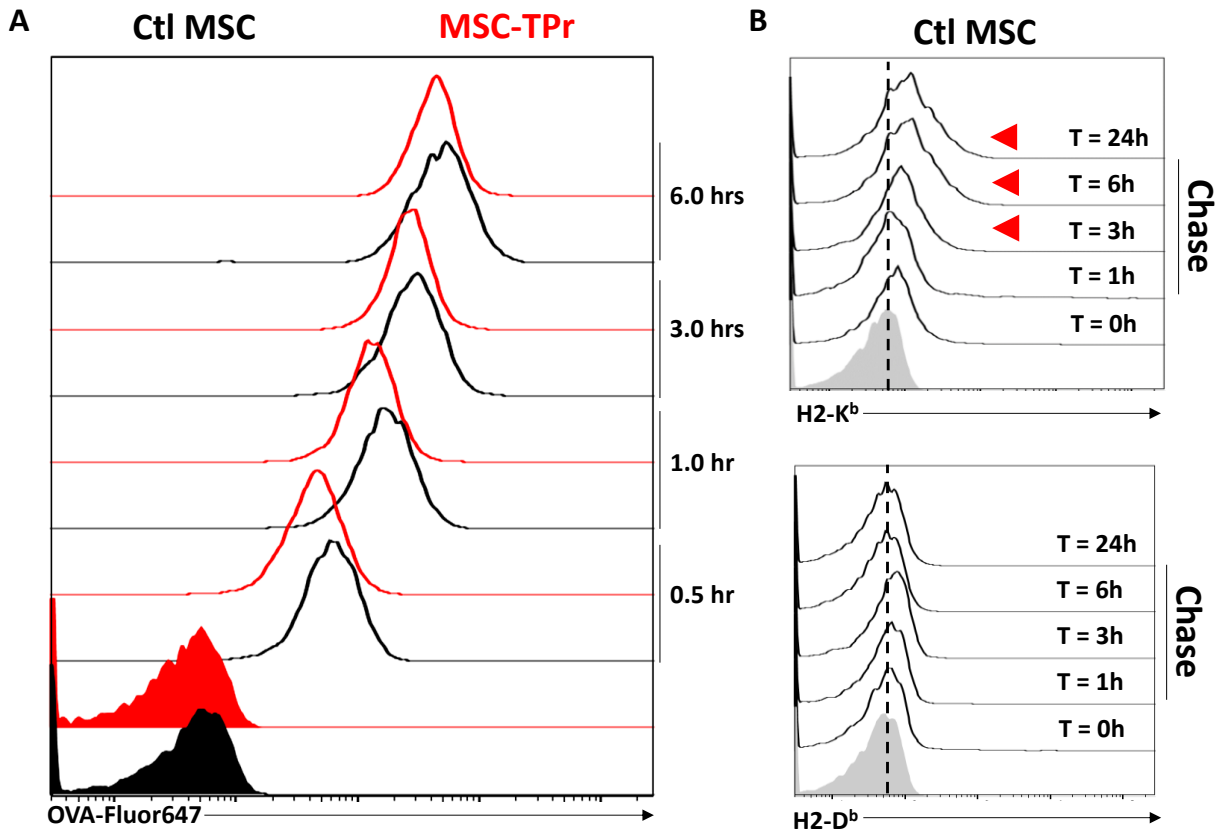

**Figure S4. Comparative analysis of OVA up-take and MHCI upregulation on Ctl MSCs in response to OVA pulsing.**

**A)** Representative flow-cytometry assessment of fluorescent OVA uptake by Ctl MSCs (black) and MSC-TPr (red) at different time points. Both cell populations were treated with 1 $\mu$ g/ml of OVA-647. **B)** Cell surface expression of MHCI molecules was assessed by flow-cytometry in response to OVA pulsing for 1h (5 mg/ml). After washing, cells were analyzed at the depicted time points. Grey histograms represent non-pulsed cells.
